# Supplementary material for: Haplotype-resolved genome and population genomics of the threatened garden dormouse in Europe
Source: HighWire-hosted journal article supplement (doi:10.1101/gr.279066.124), 2024-11-01
Supplement: Supplemental_Code.zip [file Table S1.xlsx]

## Sheet: Sheet1
ID	SampleDate	Country	Region	lat	lon	pop	%miss	depth
G190005BE	20130622	Belgium	Neerijse	50.8265	4.61002	RH	0.362753	9.0382
G190006BE	20160902	Belgium	Bekkevoort	50.9494	4.9623	RH	0.42784	8.69189
G190154BE	20190308	Belgium	Voeren	50.7487	5.79777	RH	0.0894794	12.6891
G190028RP	20171101	Germany	Rheinland-Pfalz	49.8424	8.11606	RH	0.0599641	13.0788
G190032RP	20180706	Germany	Rheinland-Pfalz	49.844	7.87313	RH	0.0358588	14.9119
G190033RP	20170628	Germany	Rheinland-Pfalz	49.9745	8.26625	RH	0.0124716	19.5293
G190035HE	20180804	Germany	Hessen	50.2025	8.57703	RH	0.0948175	12.976
G190041HE	20170726	Germany	Hessen	50.0802	8.50943	RH	0.0775344	13.9242
G190042HE	20180409	Germany	Hessen	50.0782	8.23976	RH	0.070377	14.5962
G190045RP	20180830	Germany	Rheinland-Pfalz	49.9667	7.9046	RH	0.0560862	13.2482
G190046HE	20180807	Germany	Hessen	50.0643	8.46964	RH	0.0857211	12.6466
G190047HE	20180809	Germany	Hessen	50.0649	8.24111	RH	0.0692041	12.6844
G190048RP	20160820	Germany	Rheinland-Pfalz	49.7691	8.26687	RH	0.0146499	18.4076
G190049RP	20160822	Germany	Rheinland-Pfalz	49.844	7.87313	RH	0.0366248	15.1269
G190054RP	20170723	Germany	Rheinland-Pfalz	49.75	6.63714	RH	0.0340874	16.4841
G190055RP	20160823	Germany	Rheinland-Pfalz	49.844	7.87313	RH	0.0347098	15.6717
G190058HE	20160817	Germany	Hessen	50.0436	8.35517	RH	0.0549372	13.3674
G190060HE	20160923	Germany	Hessen	50.0446	8.1963	RH	0.0747098	12.7004
G190074NI	20150417	Germany	Niedersachsen	51.8864	10.5886	SAX	0.238157	9.97441
G190075ST	20150620	Germany	Sachsen-Anhalt	51.7721	10.6965	SAX	0.293381	10.1316
G190076NI	20180827	Germany	Niedersachsen	51.6967	10.5657	SAX	0.0564931	14.8365
G190084BW	20060503	Germany	Baden-Württemberg	47.9947	7.84871	BW	0.044237	15.289
G190093RP	20130918	Germany	Rheinland-Pfalz	50.2842	7.45389	RH	0.16213	11.6965
G190096RP	20190509	Germany	Rheinland-Pfalz	50.4655	7.82757	RH	0.0567325	13.2804
G190098RP	20181203	Germany	Rheinland-Pfalz	50.3945	7.17353	RH	0.0488091	14.2339
G190099RP	20180826	Germany	Rheinland-Pfalz	50.3735	7.58709	RH	0.0131897	22.0765
G190100RP	20180712	Germany	Rheinland-Pfalz	50.3735	7.58709	RH	0.0918492	12.344
G190101RP	20180814	Germany	Rheinland-Pfalz	50.3312	7.31515	RH	0.0234111	16.0738
G190102RP	20180607	Germany	Rheinland-Pfalz	50.369	7.53143	RH	0.046152	14.007
G190105RP	20170817	Germany	Rheinland-Pfalz	50.3109	7.18197	RH	0.136182	10.9763
G190108RP	20170827	Germany	Rheinland-Pfalz	50.3275	7.20584	RH	0.0553202	14.2139
G190109ST	20190604	Germany	Sachsen-Anhalt	51.7001	10.4773	SAX	0.522537	6.94827
G190114BW	20190611	Germany	Baden-Württemberg	48.5681	8.22238	BW	0.162753	10.2942
G190155BW	20190526	Germany	Baden-Württemberg	48.3333	8.13117	BW	0.241484	9.28494
G190165NW	20190712	Germany	Nordrhein-Westfalen	50.7352	7.05642	RH	0.0581209	14.6018
G200019NI	20161201	Germany	Niedersachsen	51.7111	10.4633	SAX	0.0730102	14.1086
G200020NI	20200213	Germany	Niedersachsen	51.7704	10.8071	SAX	0.0344225	17.7191
G200088NW	20200401	Germany	Nordrhein-Westfalen	50.6436	7.08829	RH	0.0255895	18.0928
G200090NW	20200513	Germany	Nordrhein-Westfalen	50.8887	6.96583	RH	0.0223818	18.3609
G200091NW	20200401	Germany	Nordrhein-Westfalen	50.6436	7.08829	RH	0.12766	12.7233
G200093NW	20190622	Germany	Nordrhein-Westfalen	50.6087	6.99053	RH	0.0289647	20.265
G200098NW	20190704	Germany	Nordrhein-Westfalen	50.927	7.04196	RH	0.075787	25.3641
G200108BY	20200714	Germany	Bayern	50.008	11.9975	BAV	0.023076	18.3768
G200109BY	20200712	Germany	Bayern	50.1477	11.9298	BAV	0.0370078	15.8212
G200110BY	20200724	Germany	Bayern	50.0525	11.8534	BAV	0.0262837	18.7856
G200111BY	20200725	Germany	Bayern	50.0206	11.8543	BAV	0.0230042	19.112
G200222RP	20200916	Germany	Rheinland-Pfalz	49.6895	6.64027	RH	0.0206104	18.5834
G200225RP	20200428	Germany	Rheinland-Pfalz	49.6985	6.71924	RH	0.0273369	19.5142
G200243BW	20200822	Germany	Baden-Württemberg	47.8557	8.08727	BW	0.0301137	18.5779
G200246RP	20200413	Germany	Rheinland-Pfalz	49.9195	7.05487	RH	0.0678396	14.4142
G200251NW	20200723	Germany	Nordrhein-Westfalen	50.6082	6.98365	RH	0.234399	10.3458
G200252BY	20200503	Germany	Bayern	50.1015	11.8847	BAV	0.0725314	14.531
G200258ST	20200601	Germany	Sachsen-Anhalt	51.7814	10.6945	SAX	0.181831	12.0269
G200262BY	20200826	Germany	Bayern	47.3401	10.2414	BAV	0.052687	14.5347
G200263BY	20200826	Germany	Bayern	47.3446	10.2347	BAV	0.0487612	15.0556
G200281NI	20201207	Germany	Niedersachsen	51.8078	10.3592	SAX	0.0509635	15.3299
G210001NW	20200718	Germany	Nordrhein-Westfalen	50.9693	6.97914	RH	0.0469898	17.4317
G210003NI	20200531	Germany	Niedersachsen	51.8035	10.4473	SAX	0.0337283	17.87
G210007NI	20200908	Germany	Niedersachsen	51.807	10.3364	SAX	0.021927	19.3514
G210008NI	20200827	Germany	Niedersachsen	51.7665	10.6921	SAX	0.0408857	17.2601
G210010NW	20200909	Germany	Nordrhein-Westfalen	50.9453	6.8832	RH	0.0483064	15.46
G210011NW	20200923	Germany	Nordrhein-Westfalen	50.6375	7.01662	RH	0.0370317	16.5353
G200116FR	20200408	France	Bretagne	46.9224	-0.74965	RH	0.0790904	14.98
X150023FR	20140801	France	Allier	46.5001	2.8748	RH	0.251634	9.22007
X150027FR	20140801	France	Allier	46.5001	2.8748	RH	0.310784	8.83607
G180179IT	20170101	Italy	Aostatal	45.6101	7.34036	ALP	0.133621	12.5031
G180181IT	20170101	Italy	Aostatal	45.6118	7.34017	ALP	0.0732256	17.2713
G200264IT	20190728	Italy	Bozen	46.6894	10.5438	ALP	0.106738	15.5617
G200269IT	20190531	Italy	Bozen	46.6882	11.2091	ALP	0.0705685	19.5665
G200274IT	20060101	Italy	Lazio	42.2748	12.9245	IT	0.290748	11.8597
G190072LU	20190101	Luxemburg	Luxemburg	49.5078	6.28014	RH	0.0129264	18.5982
G190073LU	20190101	Luxemburg	Ettelbrück	49.8586	6.08656	RH	0.135129	11.282
G200030LU	20111107	Luxemburg	Grevenmacher	49.6594	6.43344	RH	0.138288	11.4309
G180004NL	20170214	Netherlands	Zuid-Holland	52.0235	4.3369	RH	0.0215919	18.7813
X150026NL	20140815	Netherlands	Südholland	52.2579	4.55748	RH	0.0615679	13.6551
G210022RU	20130101	Russia	Nizhny Novgorod Oblast	56.6167	44.4917	RUS	0.0653262	15.3003
G190088CH	20180621	Switzerland	Kanton Bern	46.5595	7.89293	ALP	0.454411	7.05701
G190089CH	20180621	Switzerland	Kanton Graubünden	46.6016	10.424	ALP	0.0650389	18.3551
G190152CH	20160223	Switzerland	Graubünden	46.5215	9.44283	ALP	0.0651586	19.0001
G200118CH	20010604	Switzerland	Graubünden	46.7963	10.2976	ALP	0.0743268	22.6599
G200119CH	20200808	Switzerland	Graubünden	46.7678	10.1115	ALP	0.0800239	17.5224
G190090SP	20100621	Spain	Provinz Tarragona	40.7714	0.67085	IB	0.38164	11.6201
G190091SP	20100621	Spain	Provinz Tarragona	40.7714	0.67085	IB	0.175464	11.5823
G200073SP	19940713	Spain	Provinz Tarragona	42.588	1.32584	IB	0.112819	14.6706
G200078SP	19910809	Spain	Provinz Tarragona	42.744	0.791323	IB	0.237965	18.7394
